# Supplementary material for: Metabolism of Black Carrot Polyphenols during In Vitro Fermentation Is Not Affected by Cellulose or Cell Wall Association
Source: MDPI journal article supplement (doi:10.3390/foods9121911), 2020-12-21
Supplement: s1 [file s1]

## Supplementary Material

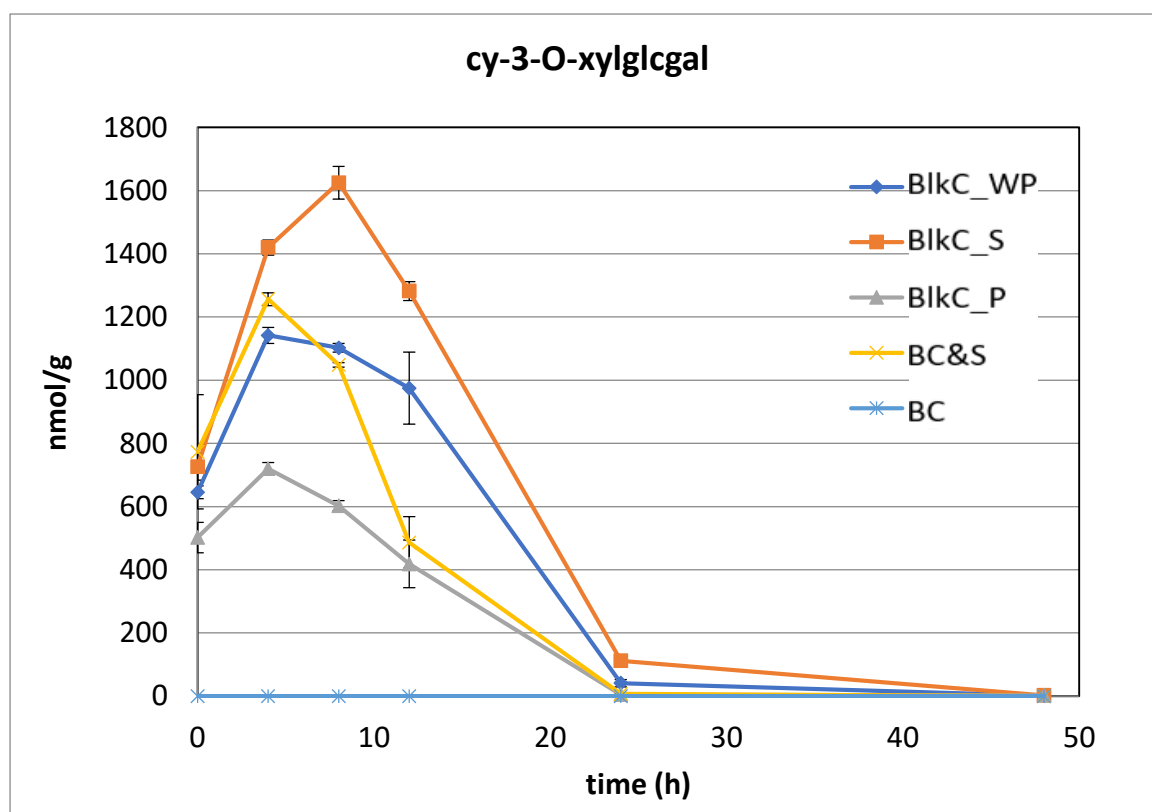

**Figure S1.** Time course plots for cy-3-O-xylglcgal for all substrates (time 0 – 48h). Data are means  $\pm$  SD ( $n=3$ ).

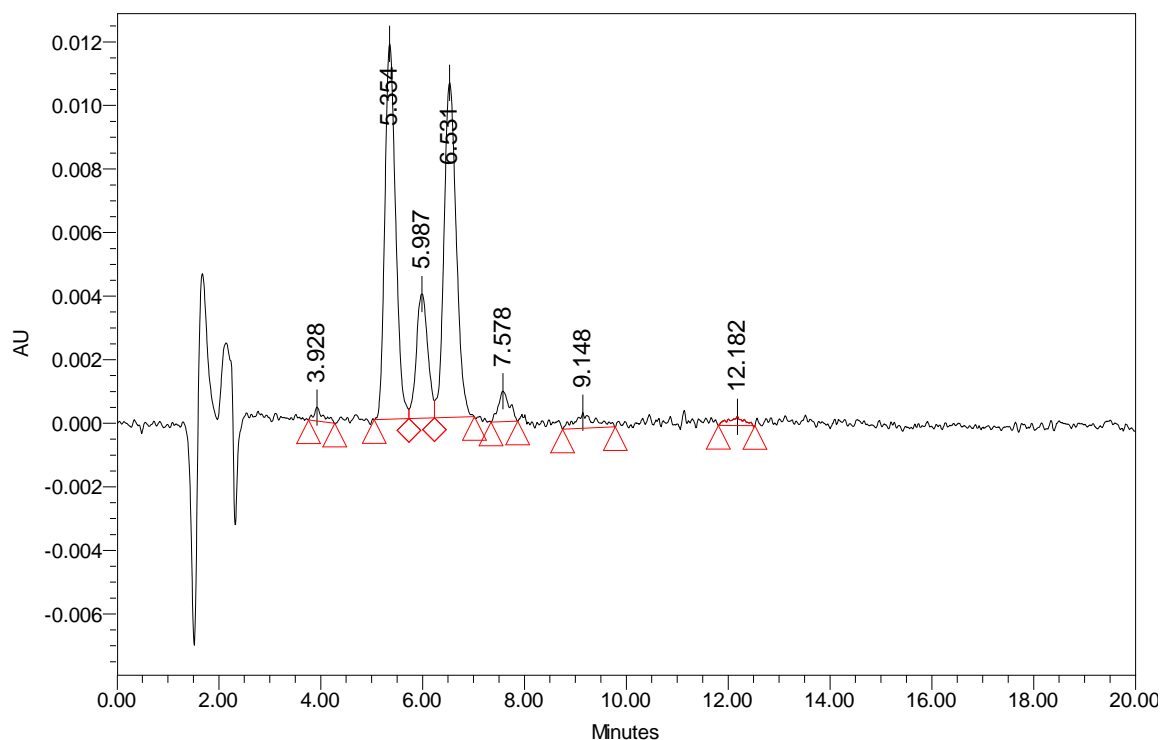

| Compounds                                   | Retention Time | <i>m/z</i>    |
|---------------------------------------------|----------------|---------------|
| cy-3-O-xylglcgal                            | 3.928          | 743 → 287     |
| cy-3-O-xylgal                               | 5.354          | 581 → 287     |
| peonidin glycoside based metabolite         | 5.987          | ? → 498 → 301 |
| sinapic acid derivative of cy-3-O-xylglcgal | 6.532          | 949 → 287     |
| pelargonidin glycoside based metabolite     | 7.578          | ? → 433 → 271 |
| ferulic acid derivative of cy-3-O-xylglcgal | 9.148          | 919 → 287     |

**Figure S2.** Representative UPLC chromatogram of BlkC-WP after 48 h. Detection was performed by UPLC-PDA at 520nm and peak identification was carried out by Orbitrap LCMS [11]. Caffeic acid and p-coumaric acid derivatives of cy-3-O-xylglcgal were not detectable after 48h.
